# Supplementary material for: Multifunctional 3D sponge-like macroporous cryogel-modified long carbon fiber reinforced polyetheretherketone implants with enhanced vascularization and osseointegration
Source: Royal Society of Chemistry journal article supplement (doi:10.1039/d2tb00725h), 2022-01-01
Supplement: d2tb00725h1.pdf [file d2tb00725h1.pdf]

**Multifunctional 3D sponge-like macroporous cryogel-modified long carbon fiber reinforced polyetheretherketone implant with enhanced vascularization and osseointegration**

**Wenying Dong <sup>1</sup>, Wendi Ma <sup>1</sup>, Shanshan Zhao <sup>1</sup>, Xingyu Zhou <sup>1</sup>, Yilong Wang <sup>1</sup>,  
Zhewen Liu <sup>2</sup>, Dahui Sun <sup>2</sup>, Mei Zhang <sup>1\*</sup>, Zhenhua Jiang <sup>1</sup>**

*1. Key Laboratory of High Performance Plastics, Ministry of Education, College of Chemistry, Jilin University, Changchun 130012, P. R. China;*

*2. Norman Bethune First Hospital, Jilin University, Changchun 130021, P. R. China*

*\*Corresponding author: [zhangmei@jlu.edu.cn](mailto:zhangmei@jlu.edu.cn)*

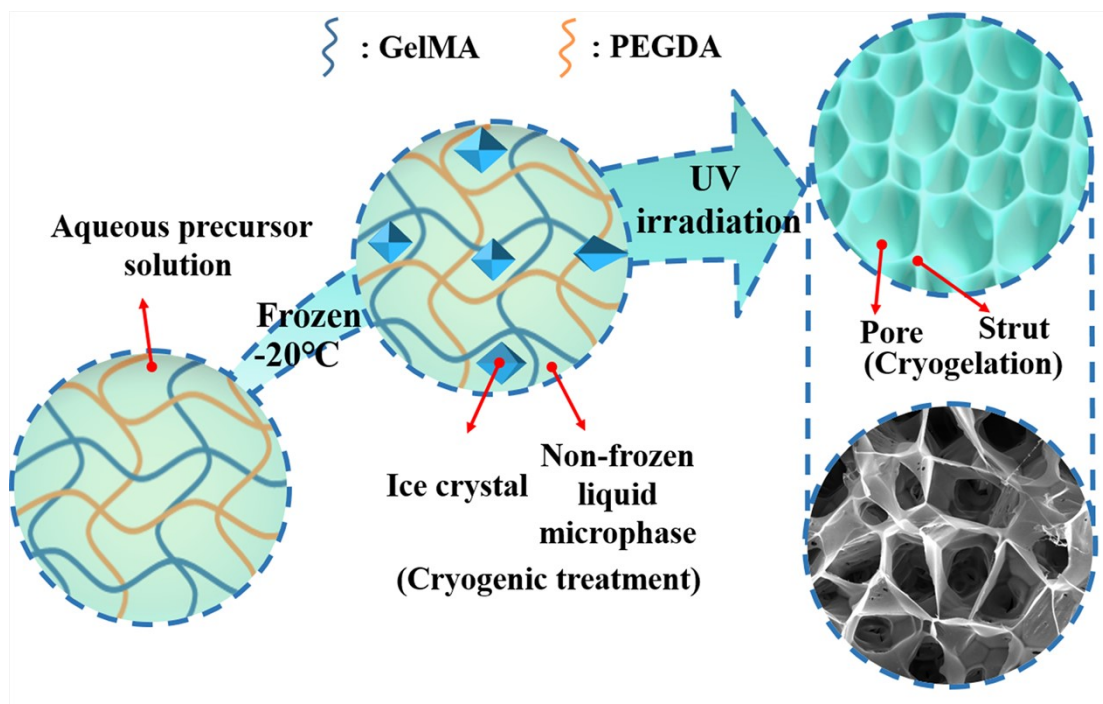

**Fig. S1.** Schematic depiction of the GelMA/PEGDA cryogel on the surface of the sulfonated LCFRPEEK formation.

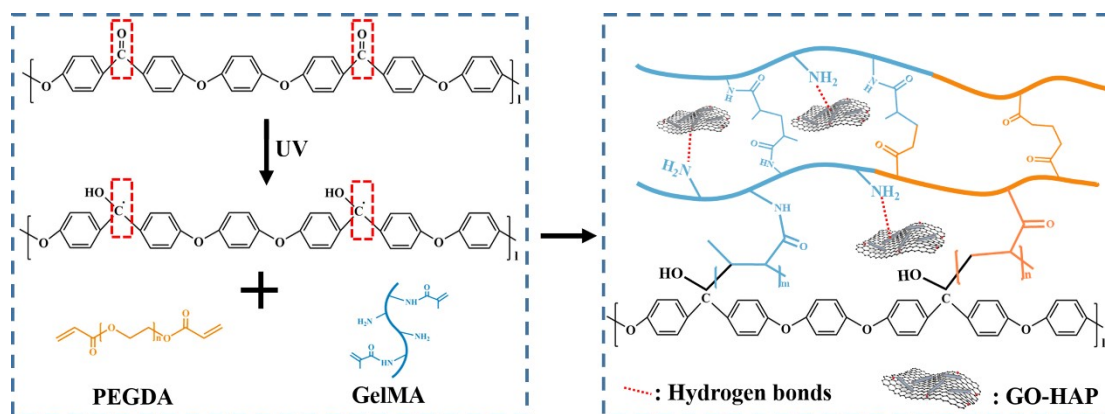

**Fig. S2.** Schematic illustration of the free radical polymerization on the surface of LCFRPEEK.

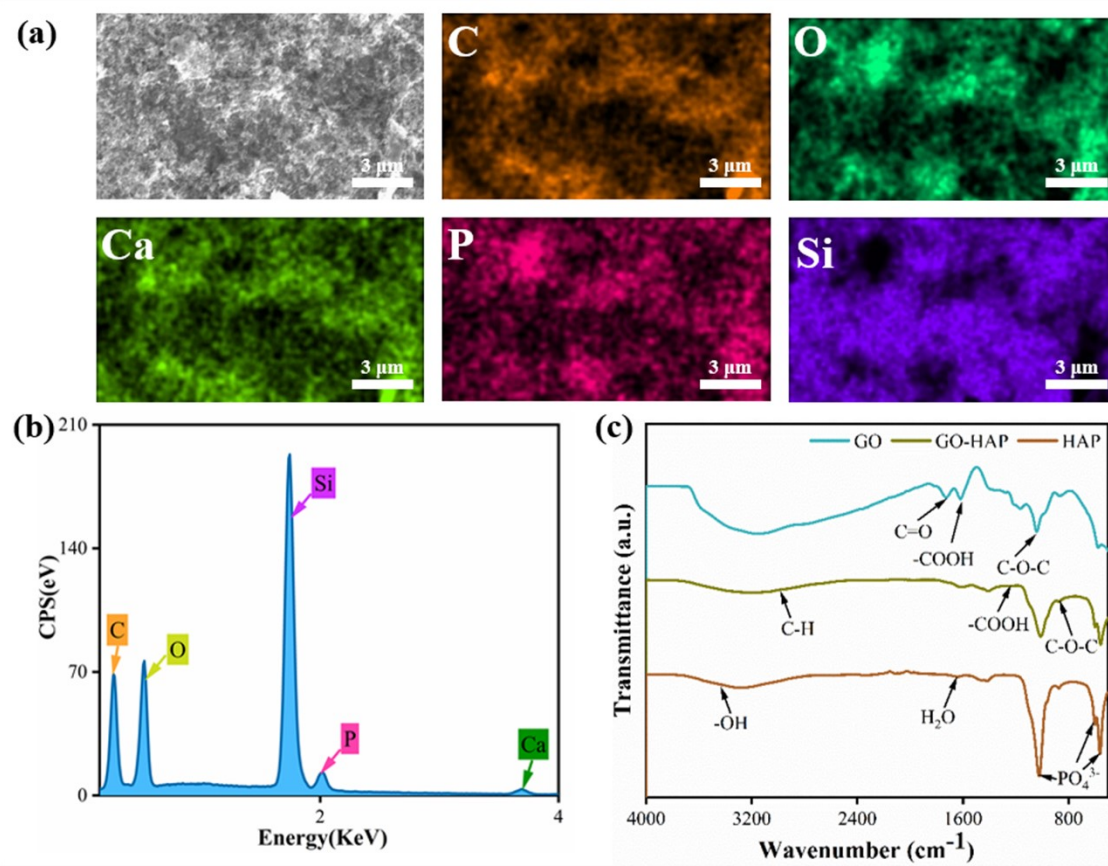

**Fig. S3.** (a) EDS images and (b) spectra of GO-HAP nanocomposite. (c) ATR-FTIR spectra of GO, HAP, and GO-HAP.

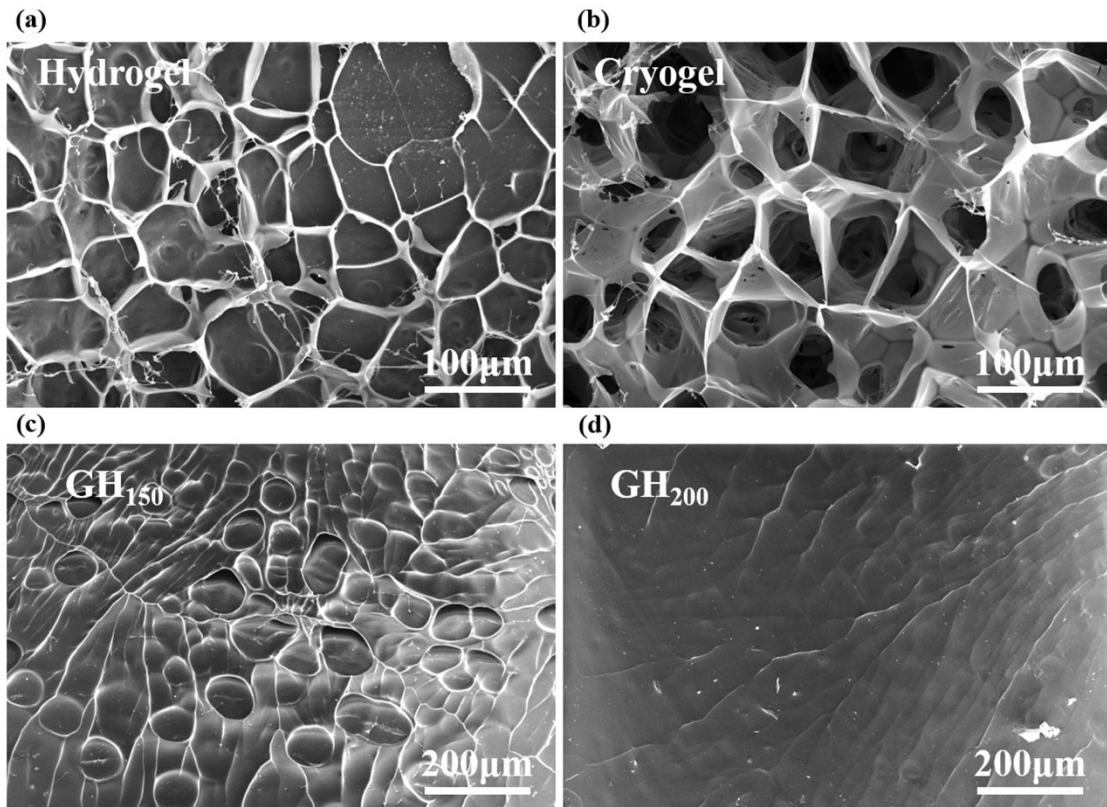

**Fig. S4.** (a) SEM images of GelMA/PEGDA hydrogel on the surface of sulfonated LCFRPEEK. [GelMA: PEGDA=10:5 wt%, the preparation method of GelMA/PEGDA hydrogel on the surface of sulfonated LCFRPEEK was similar to cryogel whereas without the freezing step.] (b) SEM images of GelMA/PEGDA cryogel on the surface of sulfonated LCFRPEEK. [GelMA: PEGDA=10:5 wt%] (c) SEM images of GH<sub>150</sub>. [The preparation of GH<sub>150</sub> was consistent with GH<sub>100</sub> whereas the concentrations of GO-HAP were 150 ng mL<sup>-1</sup>.] (d) SEM images of GH<sub>200</sub>. [The preparation of GH<sub>200</sub> was consistent with GH<sub>100</sub> whereas the concentrations of GO-HAP were 200 ng mL<sup>-1</sup>.]

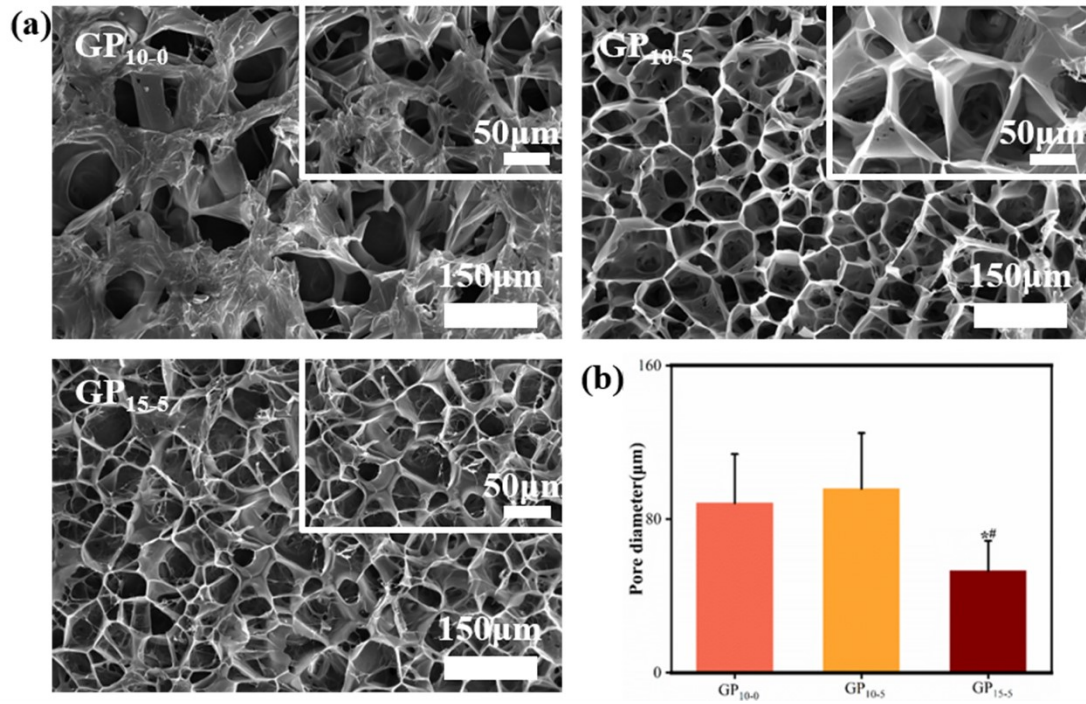

**Fig. S5.** (a) SEM images of: GP<sub>10-0</sub>, GP<sub>10-5</sub> and GP<sub>15-5</sub> at high and low magnifications. Scale bars = 50 μm and 150 μm. (b) The pore diameters of GP<sub>10-0</sub>, GP<sub>10-5</sub> and GP<sub>15-5</sub>, \* and # represented  $p < 0.05$  when compared with GP<sub>10-0</sub> and GP<sub>10-5</sub>, respectively.

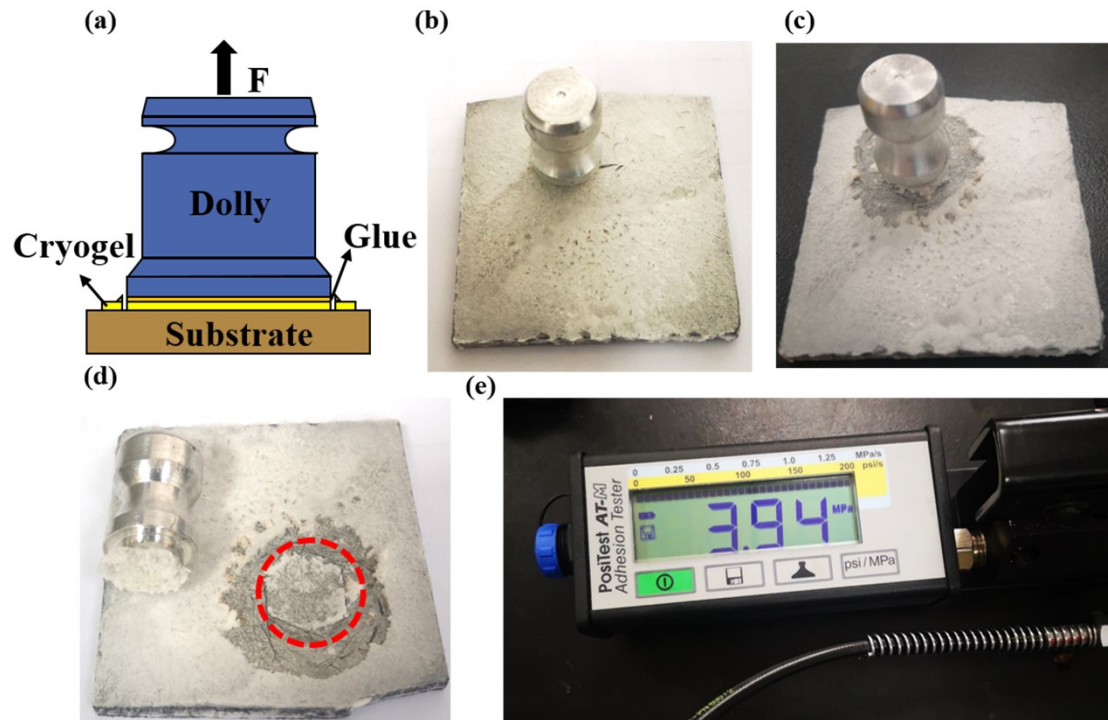

**Fig. S6.** (a) Diagram of the experimental device of the pull-off method. (b) Image of GP<sub>10-5</sub> after adhering the dolly with epoxy glue. (c) Image of GP<sub>10-5</sub> after cutting by the cutter. (d) Image of GP<sub>10-5</sub> and the dolly after pull-off test. (e) Adhesion data of GP<sub>10-5</sub>.

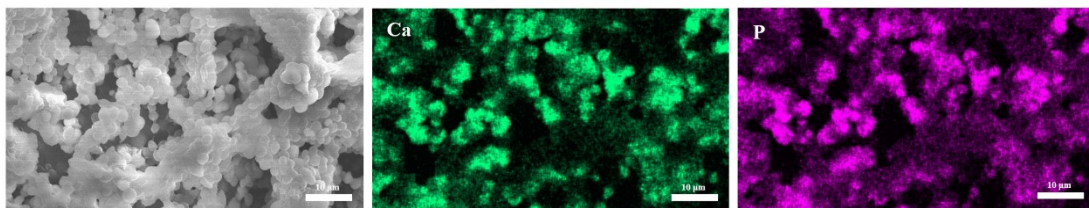

**Fig. S7.** EDS images of GH<sub>100</sub> after soaking in SBF for 7 days. Scale bars = 10 µm.

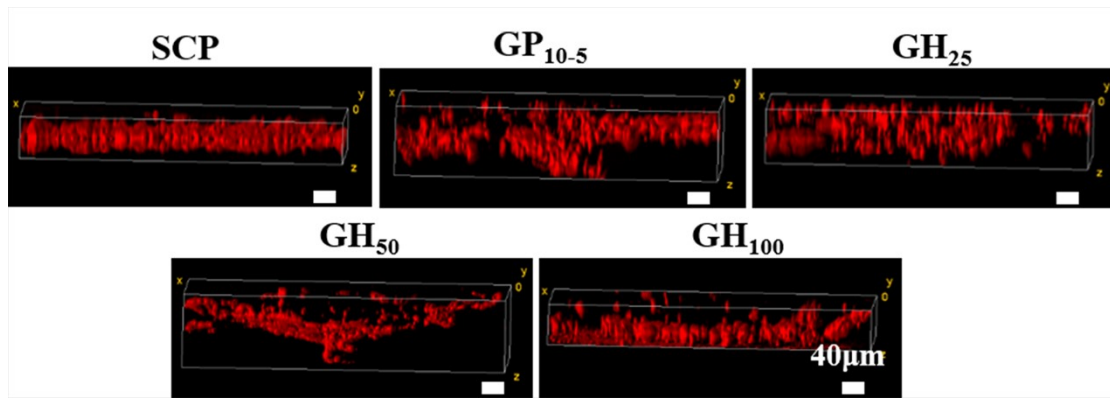

**Fig. S8.** Representative 3D CLSM images of HUVEC migration into different scaffolds stained using TRITC-phalloidin for cytoskeletal organization. Scale bars = 40  $\mu\text{m}$ .

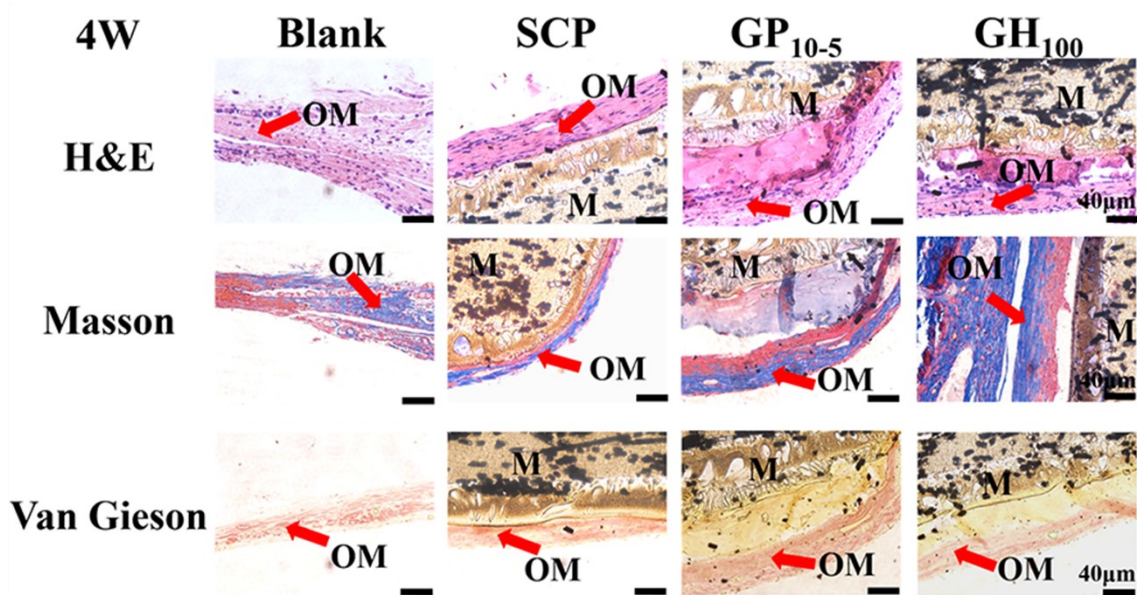

**Fig. S9.** H & E, Masson and Van Gieson staining of the calvarial defect regions after treatment with different samples for 4 weeks. Scale bars = 40  $\mu\text{m}$ . [M, Materials; OM, osteoid matrix (red arrows)].

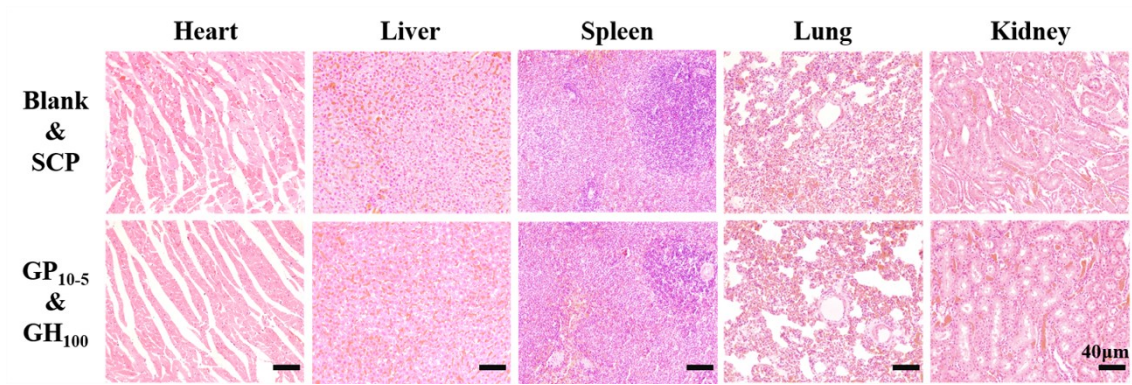

**Fig. S10.** Histological observation of H & E staining of tissues (heart, liver, spleen, lung, and kidney) after 12 weeks of treatments. Scale bar = 40  $\mu$ m.

**Table S1** Primer pairs used in RT-PCR analysis.

| Genes | Forward primer sequence (5'-3') | Reverse primer sequence (5'-3') |
|-------|---------------------------------|---------------------------------|
| BMP-2 | ATTAGCAGGTCTTTGCACCA            | ACGCTTTTCTCGTTTGTGGA            |
| Runx2 | GGCAGCACGCTATTAAATCCA           | GACTCATCCATTCTGCCGCTA           |
|       | A                               |                                 |
| ALP   | ATCGGAACAACCTGACTGACC           | CTGCCTCCTTCCACTAGCAA            |
| COL-I | ATGCCATCAAGGTCTACTGCAA          | GAACCTTCGCTTCCATACTCG           |
| GAPDH | TATGACTCTACCCACGGCAAG           | ATACTCAGCACCAGCATCACC           |



**Table S2** Elemental composition of different substrate surfaces as determined by XPS.

| Material           | C (%) | N (%) | O (%) | S (%) | Ca (%) | P (%) |
|--------------------|-------|-------|-------|-------|--------|-------|
| SCP                | 58.84 | ---   | 40.06 | 1.09  | ---    | ---   |
| GP <sub>10-5</sub> | 41.17 | 10.11 | 48.72 | ---   | ---    | ---   |
| GH <sub>100</sub>  | 44    | 12.46 | 40.97 | ---   | 1.6    | 0.96  |

**Table S3** Changes in Ca and P content of GH<sub>100</sub> sample before and after immersion in SBF by EDS.

| Sample                  | Ca (%) | P (%) | Ca/P |
|-------------------------|--------|-------|------|
| Before immersion in SBF | 1.6    | 0.96  | 1.67 |
| After immersion in SBF  | 3.87   | 2.1   | 1.84 |
| New bone-like apatite   | 2.27   | 1.14  | 1.99 |
